# Supplementary material
Source: publisher figshare collection journal article supplement (https://sage.figshare.com/ndownloader/files/13852928)
Supplement: Supplementary file 1 [file 13852928]

## **Appendix**

### **Question wording and response categories**

#### **Knowledge on defense policy**

F46A. Shortly before the end of the interview, I would like to ask you some more questions about the Bundeswehr and its deployments. The first question concerns the number of Bundeswehr personnel on deployment abroad. How many Bundeswehr troops, do you think, are currently on deployment abroad? (OPEN, ENTER NUMBER); 98: Don't know (SPONTANEOUS); 99: No answer (SPONTANEOUS)

F46B. Only one of the four potential answers to the following questions is correct. Please tell me the correct answer. Who is the present German Federal Minister of Defense?

**\*\*RANDOM;** 1: Andrea Nahles; 2: Thomas de Maizière; 3: Ursula von der Leyen; 4: Annette Schavan; 98: Don't know (SPONTANEOUS); 99: No answer (SPONTANEOUS)

F46C. At present, Germany is also participating in the UN Peacekeeping Force in Lebanon (UNIFIL). Which Bundeswehr branch is mainly involved in this mission? **\*\*RANDOM;** 1: Navy; 2: Air Force; 3: Army; 4: Medical Service; 98: Don't know (SPONTANEOUS); 99: No answer (SPONTANEOUS)

F46D. Who has to consent on principle before the Bundeswehr can start an armed mission abroad? **\*\*RANDOM;** 1: The European Parliament; 2: The German Federal President; 3: The UN Security Council; 4: The German Bundestag; 98: Don't know (SPONTANEOUS); 99: No answer (SPONTANEOUS)

F46E. Which of the following statements is correct? **\*\*RANDOM;** 1: Women may only be employed as medical staff; 2: Women may only work in the civilian federal defense administration; 3: Armed forces service is generally open for women; 4: An officer career is not open to women; 98: Don't know (SPONTANEOUS); 99: No answer (SPONTANEOUS)

F46F. The last question refers to the number of Bundeswehr soldiers. How many soldiers are currently serving in the Bundeswehr? (OPEN, ENTER NUMBER): 98: Don't know (SPONTANEOUS); 99: No answer (SPONTANEOUS)

### **Resources and socio-demographics**

Women: S1. Gender of the target person; 1: Male; 2: Female. Recoding: 0: Men; 1: Women.

Age: S2. Please tell me how old you are. No recoding.

Education: S7. What kind of educational qualification do you have? 1: Lower secondary school leaving certificate; 2: General Certificate of Secondary Education; 3: Entrance qualification for a technical college, completion of a technical secondary school; 4: Abitur (INT.: General university-entrance diploma); 5: University or university of applied sciences degree; 6: Another school-leaving certificate, i.e.: \*OPEN; 7: Still going to school; 97: no qualification; 98: Don't know (SPONTANEOUS); 99: No answer (SPONTANEOUS).

Recoding: Low level of education: 1+97: 1, All others: 0; High level of education 3-5: 1, all others: 0.

Net household income: S10. What is the monthly net income of your entire household after tax and social security? All sources of revenue combined: Which of the following net income groups does your household belong to? 1: below € 500; 2: € 501 – 1,000; 3: € 1,001 – 2,000; 4: € 2,001 – 3,000; 5: € 3,001 – 4,000; 6: € 4,001 – 5,000; 7: € 5,001 or more; 99: No answer (SPONTANEOUS). Recoding: Low income: 1-3: 1, all others: 0; High income: 6+7: 1, all others: 0.

East Germany: Place of residence in Berlin, Brandenburg, Mecklenburg-Western Pomerania, Saxony, Saxony-Anhalt or Thuringia: 1, all others: 0.

Migration background: S14. INT.: THIS REFERS TO GERMANY WITHIN THE BORDERS OF 1990. IF SOMEONE WAS BORN ON FORMER GERMAN TERRITORY, I.E. SILESIA OR EAST PRUSSIA, THIS MEANS "NO, IN ANOTHER COUNTRY". Were you born on current German territory? 1: Yes, on current German territory; 2: No, in another country; 98: Don't know (SPONTANEOUS); 99: No answer (SPONTANEOUS); \*\*Filter: IF  $S14 = 2$  (when born in another country), S15. INT.: IF YOU WERE BORN IN ANOTHER COUNTRY (13), PLEASE STATE. Please tell me where you were born. 1: Former eastern territories of Germany (e.g., Silesia, Pomerania, East Prussia); 2: Turkey; 3: Poland; 4: Italy; 5: Romania; 6: Greece; 7: Russia, Russian Federation, former Soviet Union (USSR); 8: Croatia, Serbia, Bosnia and Herzegovina, Kosovo, former Yugoslavia; 9: Austria; 10: Switzerland; 11: France; 12: USA; 13: Other country, i.e. \_\_\_\_; 98: Don't know (SPONTANEOUS); 99: No answer (SPONTANEOUS).

S16. INT.: THIS REFERS TO GERMANY WITHIN THE BORDERS BEFORE 1990. IF SOMEONE WAS BORN ON FORMER GERMAN TERRITORY, I.E. SILESIA OR EAST PRUSSIA, THIS MEANS "NO, IN ANOTHER COUNTRY". Were your parents born on current German territory? 1: Yes, on current German territory; 2: No, my mother was born in another country; 3: No, my father was born in another country; 4: No, mother and father were born in another country; 98: Don't know (SPONTANEOUS); 99: No answer (SPONTANEOUS); S17. INT.: IF THEY WERE BORN IN ANOTHER COUNTRY (13) PLEASE STATE. Please tell me where your mother was born. Country list similar to S15; S18. INT.: IF THEY WERE BORN IN ANOTHER COUNTRY (13) PLEASE STATE. Please tell me where your father was born. Country list similar to S15. Recoding: Migration background: if  $S14 = 2$  and  $S15 \neq 1$  and  $S16 \neq 1$ . Furthermore, if  $S16 \neq 1$  and  $S17 \neq 1$  and if  $S16 \neq 1$  and  $S18 \neq 1$ .

## **Motivation**

Internal efficacy: F43. Please tell me for each statement whether you agree completely, agree somewhat or whether you disagree somewhat or disagree completely. \*\*RANDOM; A: I am confident that I can assume an active role in a group that deals with defense issues. B: I generally don't know very much about the Bundeswehr. C: I am able to understand and assess well questions concerning defense policy. D: Defense policy is so complicated that someone like me cannot understand what is going on. 1: Completely agree; 2: Somewhat agree; 3: Neither agree nor disagree; 4: Somewhat disagree; 5: Completely disagree; 98: Don't know (SPONTANEOUS); 99: No answer (SPONTANEOUS). Recoding: All items were recoded to a range from 0 (no efficacy) to 1 (high efficacy). The index is the mean over all four items.

Interest in politics: F41. How much are you interested in politics in general?

1: Very much; 2: Much; 3: Somewhat; 4: A little; 5: Not at all; 98: Don't know (SPONTANEOUS); 99: No answer (SPONTANEOUS). Recoding: Range of values from 0 (not at all interested) to 1 (very much interested).

Intention to vote: F45. If federal elections were to take place next Sunday, which of the following parties would you vote for? 1: CDU/CSU; 2: SPD; 3: Alliance 90 / The Greens; 4: The Left; 5: FDP; 6: AfD; 7: The Pirates; 8: Other parties, i.e. \*OPEN; 9: No party, would not vote; 98: Don't know (SPONTANEOUS); 99: No answer (SPONTANEOUS). Recoding:

Intention to vote: 1-8: 1, All others: 0.

## **Opportunity structures**

Respondent is/was a soldier: S3. Which of the following statements apply to you? A: I currently work for the Bundeswehr. (INT.: Civilians (civil servant, employee) or soldiers (career service member, temporary-career volunteer, military service volunteer)), B: I served

in the Bundeswehr. (INT.: Civilians (civil servant, employee) or soldiers (career service member, temporary-career volunteer, military service volunteer)). 1: Yes, 2: No, 98: Don't know (SPONTANEOUS); 99: No answer (SPONTANEOUS). Recoding: Respondent is/was a soldier: S3A=1 or S3B=1, all others: 0.

Relative/acquaintance is/was a soldier: S3. Which of the following statements apply to you? C: One of my closest relatives is serving/served in the Bundeswehr. (INT.: Civilians (civil servant, employee) or soldiers (career service member, temporary-career volunteer, military service volunteer)). 1: Yes, 2: No, 98: Don't know (SPONTANEOUS); 99: No answer (SPONTANEOUS). Recoding: Relative/acquaintance is/was a soldier: S3C=1, all others: 0.

Index of personal perception of the Bundeswehr: F21. Have you noticed the Bundeswehr on the following occasions during the past 12 months? \*\*RANDOM, A: In everyday life, where you live, i.e. on the street or when you go shopping? B: At public events? C: In talks with friends, relatives or colleagues? 1: Yes, 2: No, 98: Don't know (SPONTANEOUS); 99: No answer (SPONTANEOUS). Recoding: Additive index of positive answers on all 3 items. Range of values: 0 (no personal perception) to 3 (perception via all channels).

Index of mass media coverage of the Bundeswehr. F21. Have you noticed the Bundeswehr on the following occasions during the past 12 months? \*\*RANDOM; D: On television? E: On the radio? F: On the internet? G: In newspapers and magazines? 1: Yes, 2: No, 98: Don't know (SPONTANEOUS); 99: No answer (SPONTANEOUS). Recoding: Additive index of positive answers on all 4 items. Range of values: 0 (no personal perception) to 3 (perception via all channels).

TV consumption: F40. How often have you used the following media in the last week? A: Television, 1: Daily, 2: Several times per week, 3: Once a week, 4: Not at all, 98: Don't know (SPONTANEOUS); 99: No answer (SPONTANEOUS). Recoding: Range of values from 0 (no use) to 1 (daily use).

Newspaper consumption: F40. How often have you used the following media in the last week? B: Newspapers and Magazines. Scale and recoding similar to TV consumption.

Radio consumption: F40. How often have you used the following media in the last week?

C: Radio. Scale and recoding similar to TV consumption.

Internet consumption: F40. How often have you used the following media in the last week?

D: Internet. Scale and recoding similar to TV consumption.

## Supporting tables and figures

**Table A1: Knowledge on defense policy in Germany, 2016**

| Question/answer                                                    | Percent |
|--------------------------------------------------------------------|---------|
| <i>German Federal Minister of Defense</i>                          |         |
| Ursula von der Leyen*                                              | 93.5    |
| Thomas de Maizière                                                 | 2.1     |
| Annette Schavan                                                    | 0.7     |
| Andrea Nahles                                                      | 0.6     |
| Don't know/no response                                             | 3.2     |
| <i>Employment opportunities for women in the Bundeswehr</i>        |         |
| Armed forces service is generally open for women*                  | 74.5    |
| Women may only be employed as medical staff                        | 6.8     |
| An officer career is not open to women                             | 5.4     |
| Women may only work in the civilian Federal defense Administration | 4.0     |
| Don't know/no response                                             | 9.3     |
| <i>Approval of operations abroad</i>                               |         |
| Bundestag*                                                         | 70.8    |
| UN Security Council                                                | 9.7     |
| Federal President                                                  | 5.1     |
| European Parliament                                                | 4.1     |
| Don't know/no response                                             | 10.3    |
| <i>Service UNIFIL mission</i>                                      |         |
| Navy*                                                              | 37.7    |
| Medical Service                                                    | 12.6    |
| Army                                                               | 10.4    |
| Air Force                                                          | 9.6     |
| Don't know/no response                                             | 29.7    |
| <i>Number of soldiers on deployment abroad</i>                     |         |
| Up to 2,999                                                        | 21.1    |
| 3,000- to 4,999*                                                   | 17.8    |
| 5,000 to 7,999                                                     | 13.5    |
| 8,000 to 10,999                                                    | 9.0     |
| 11,000 to 19,999                                                   | 3.3     |
| 20,000 to 500,000                                                  | 10.6    |
| Don't know/no response                                             | 24.8    |
| <i>Number of Bundeswehr soldiers</i>                               |         |
| Up to 109,999                                                      | 27.9    |
| 140,000 to 169,999                                                 | 4.4     |
| 170,000 to 199,999*                                                | 14.1    |
| 200,000 to 229,999                                                 | 11.4    |
| 300,000 to 2,000,000                                               | 8.4     |
| 110,000 to 139,999                                                 | 3.7     |
| 230,000 to 259,999                                                 | 0.5     |
| 260,000 to 299,999                                                 | 6.2     |
| Don't know/no response                                             | 23.3    |

Notes: \*Correct answer.

Data: 2016 ZMSBw public opinion survey.
